# Supplementary material for: In Vitro Compression Model for Orthodontic Tooth Movement Modulates Human Periodontal Ligament Fibroblast Proliferation, Apoptosis and Cell Cycle
Source: MDPI journal article supplement (doi:10.3390/biom11070932), 2021-06-23
Supplement: s1 [file s1]

| Gene symbol       | Gene name (homo sapiens)                                               | Gene function                                                                           | Acc. No. (NCBI Gene Bank) | Chromosomal location (length) | 5'-forward primer-3' (length/Tm/%GC)         | 5' reverse primer-3' (length/Tm/%GC)          | Primer location | Amplicon length (bp) | Amplicon location (bp of start/ stop) | Intron flanking | Variants targeted (transcript /splice) |
|-------------------|------------------------------------------------------------------------|-----------------------------------------------------------------------------------------|---------------------------|-------------------------------|----------------------------------------------|-----------------------------------------------|-----------------|----------------------|---------------------------------------|-----------------|----------------------------------------|
| <b>MCM2</b>       | minichromosome maintenance complex component 2                         | initiation of eukaryotic genome replication                                             | NM_004526.4               | 3; 3q21.3 (3434 bp)           | gtggtagctgctatggcggaat (21 bp/59.9°C/52%GC)  | tgagaggatcattgcctcgc (20 bp/59.4°C/55%GC)     | Exon 1/ Exon2   | 84                   | 46/129                                | yes             | yes                                    |
| <b>IL-6</b>       | interleukin 6                                                          | induction of transcriptional inflammatory response                                      | NM_000600                 | 7; 7p15.3 (1127 bp)           | catctcgacggcatctcag (20 bp/60.32°C/60%GC)    | tcaccaggcaagtctccta (20 bp/60.47°C/55%GC)     | Exon 2/ Exon 4  | 164                  | 240/403                               | yes             | yes                                    |
| <b>IL-8</b>       | interleukin 8                                                          | induction of transcriptional inflammatory response                                      | NM_000584                 | 4; 4q13.3 (1642 bp)           | catactccaaacctttccacc (21 bp/57.9°C/47,6%GC) | cttcaaaaacttctccacaacc (22 bp/56.9°C/40,9%GC) | Exon 2/ Exon 3  | 167                  | 206/372                               | yes             | yes                                    |
| <b>PCNA</b>       | proliferating Cell Nuclear Antigen                                     | cofactor DNA-polymerase $\delta$ ; Increase processivity of leading strand synthesis    | NM_002592.2               | 20; 20p12.3 (1355 bp)         | tggagaacttggaatggaaac (22 bp/56.5°C/40%GC)   | gaactggttcattcatctatgg (24 bp/59.3°C/41%GC)   | Exon 5/ Exon 6  | 95                   | 755/849                               | yes             | yes                                    |
| <b>CCNA1</b>      | cyclin A1                                                              | regulation of CDK2 and CDC2; control of cell cycle                                      | NM_003914                 | 13; 3q13.3 (1730 bp)          | cccaagcaagggttgacatc (21 bp/59.73°C, 52%GC)  | taccagcataggggaaactgtg (22 bp/59.76°C/50%GC)  | Exon 3/ Exon 4  | 171                  | 515/685                               | yes             | yes                                    |
| <b>CCND1</b>      | cyclin D1                                                              | regulation of CDK4 and CDK6 required for cell cycle G1/S transition                     | NM_053056.3               | 11; 11q13.3 (4238 bp)         | gatgccaacctctcaacga (20 bp/59.4°C/55%GC)     | gttcctcgagacctccag (19 bp/61°C/63%GC)         | Exon 1/ Exon 2  | 157                  | 213/369                               | yes             | yes                                    |
| <b>LCN2/ NGAL</b> | lipocalin-2; oncogene 24p3; neutrophil gelatinase-associated lipocalin | innate immunity; maintenance of homeostasis; suppression of invasiveness and metastasis | NM_005564.5               | 9; 9q34.11 (820 bp)           | ctccacctcagacctgatcc (20 bp/59°C/60%GC)      | acataccacttcccctggaat (21 bp/59°C/48%GC)      | Exon 1/ Exon 2  | 93                   | 139/231                               | yes             | yes                                    |
| <b>RPL22</b>      | ribosomal protein L22                                                  | component of the ribosomal 60S subunit                                                  | NM_000983                 | 1; 1p36.31 (2061 bp)          | tgattgcacccacctgtag (20 bp/59.67°C/55%GC)    | ggttcccagcttttcggttc (20 bp/59,4°C/55%GC)     | Exon 2/ Exon 3  | 98                   | 91/188                                | yes             | yes                                    |
