# Supplementary figures and images for: In Vitro Compression Model for Orthodontic Tooth Movement Modulates Human Periodontal Ligament Fibroblast Proliferation, Apoptosis and Cell Cycle
Source: MDPI journal article supplement (doi:10.3390/biom11070932), 2021-06-23

Figure 5S

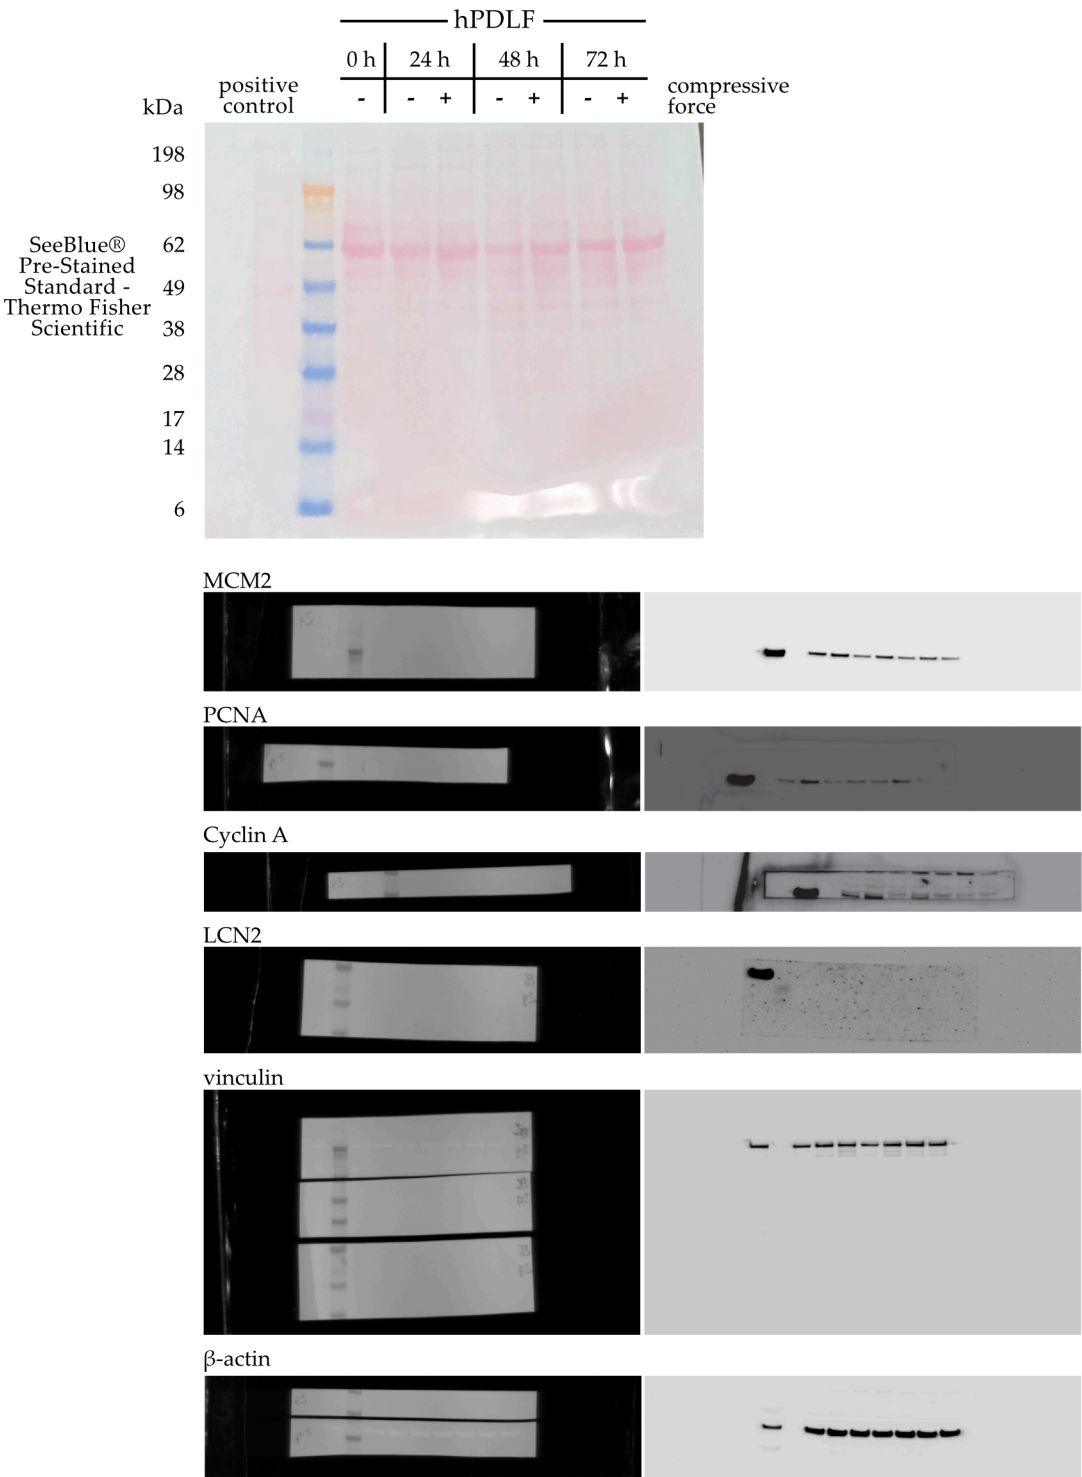

Supplement: s1 [file s1]
